# Supplementary material
Source: publisher figshare collection journal article supplement (https://gsapubs.figshare.com/ndownloader/files/23315660)
Supplement: Supplementary file 1 [file 23315660]

Dean, D.J., and Topping, D.J., 2019, Geomorphic change and biogeomorphic feedbacks in a dryland river: The Little Colorado River, Arizona, USA: GSA Bulletin, <https://doi.org/10.1130/B35047.1>.

## Data Repository

**Figure DR1.** 1923-2016 repeat photographs of the LCR at Cameron, AZ.

**Figure DR2.** Image of the Lyman Lake Dam following the dam break in 1915. Image obtained from [http://web.sahra.arizona.edu/education2/wrtt/lecs/Johnson\\_P2\\_DamFailures\\_ho.pdf](http://web.sahra.arizona.edu/education2/wrtt/lecs/Johnson_P2_DamFailures_ho.pdf).

**Figure DR3.** Aerial-photograph maps of the *above Cameron*, *Cameron to Moenkopi*, and *below Moenkopi* reaches (a), *Black Falls* reach (b), and *Grand Falls* reaches (c). Images were taken in 2013 by the National Aerial Imagery Program.

**Figure DR4.** Topographic measurements made at the Grand Falls cableway cross section depicting seasonal scour and fill in 1929 and 1930. Elevations are orthometric heights above the 1983 North American Datum, calculated using GEOID 12a.

**Figure DR5.** Minimum bed elevation observed during discharge measurements at the Grand Falls and near Cameron Gages. High and low flow periods refer to periods of high and low TAF in Hydrology Results section and are depicted by gray dashed lines.

**Figure DR6.** Discharge — suspended-silt-and-clay concentration relations at the *at* Cameron gage (a and b) and the *near* Cameron gage (c and d). Summer/fall season relations for suspended silt and clay are shown in (a) and (c). Winter/spring season relations for suspended silt and clay are shown in (b) and (d).

**Figure DR7** (previous page). Repeated cross sections in the *above Grand Falls* reach, from upstream (a) to downstream (d). Within original 1940 survey, cross sections were labeled as D, C, B, A, A', from upstream to downstream. Thus, here, cross section D is shown in (a), cross section B is shown in (b), cross section A is shown in (c), and cross section A' is shown in (d). Cross section C is presented in Figure 7c. Elevations are orthometric heights above the 1983 North American Datum, calculated using GEOID 12a. The local 1940 coordinates have been translated accordingly.

**Figure DR8** (this page and previous two pages). Repeated cross sections in the *above Cameron* reach from upstream (a) to downstream (i). Cross sections (a) – (h) represent the first 8 cross sections, and (i) represents the 10<sup>th</sup> cross section downstream. The 9<sup>th</sup> cross section is depicted in

Figure 7d. Elevations are orthometric heights above the 1983 North American Datum, calculated using GEOID 12a.

**Figure DR9.** Repeat photograph of LCR above Cameron, AZ. Photo (a) depicts the LCR in October 21, 1964 looking downstream. Photo (b) depicts the LCR on December 13, 2016. Photo (a) was taken by unknown photographer of the USGS, and photo (b) was taken by the authors. Note that the low bridge in the middle of the photo was removed in 2016 prior to the date photo (b) was collected.

**Figure DR10.** Channel cross section surveys at the former bridge crossing above Cameron, AZ. Note that when the bridge was removed, the abutments were also removed resulting in less vertical banks during the 2016 survey. Elevations from 1983 are likely within about 0.5 m, as the elevations were measured down from the bridge railing, and the exact elevation of the bridge and its railing were unknown during the 2016 survey because the bridge had been removed.

**Figure DR11.** Photograph of the LCR looking downstream in the *Cameron to Moenkopi* reach showing the dominant vegetation types of tamarisk and willow. Photograph taken by D.J. Dean on May 19, 2016.

**Figure DR12.** Annual precipitation data for Winslow, AZ (a), Springerville, AZ (b), and the number of days with greater than 2.54 cm of rain at Winslow (c), Springerville (d). Annual data are diamonds, horizontal lines are averages for the four time periods identified in the Hydrology Results section, and dark wavy lines are 5-year running averages. Data were obtained from <https://www.ncdc.noaa.gov/cdo-web/datatools/>. Missing data was obtained from Sellers and Hill (1974).

**Table DR1.** Sediment Sampling Locations

**Table DR2.** AERIAL PHOTOGRAPH SOURCES

**Table DR3.** ERRORS ASSOCIATED WITH CHANNEL WIDTH MEASUREMENTS ON AERIAL PHOTOGRAPHS

**Table DR4.** HYDRAULIC MODELING PARAMETERS

**Table DR5.** HYDRAULIC MODELING INPUTS

**Table DR6.** CHANNEL WIDTH MEASUREMENTS DETERMINED FROM AERIAL PHOTOGRAPH ANALYSIS

**Table DR7.** RESULTS OF THE REGRESSION ANALYSES FOR DISCHARGE—CONCENTRATION RELATIONS

**Table DR8.** RESULTS OF HYDRAULIC MODELING

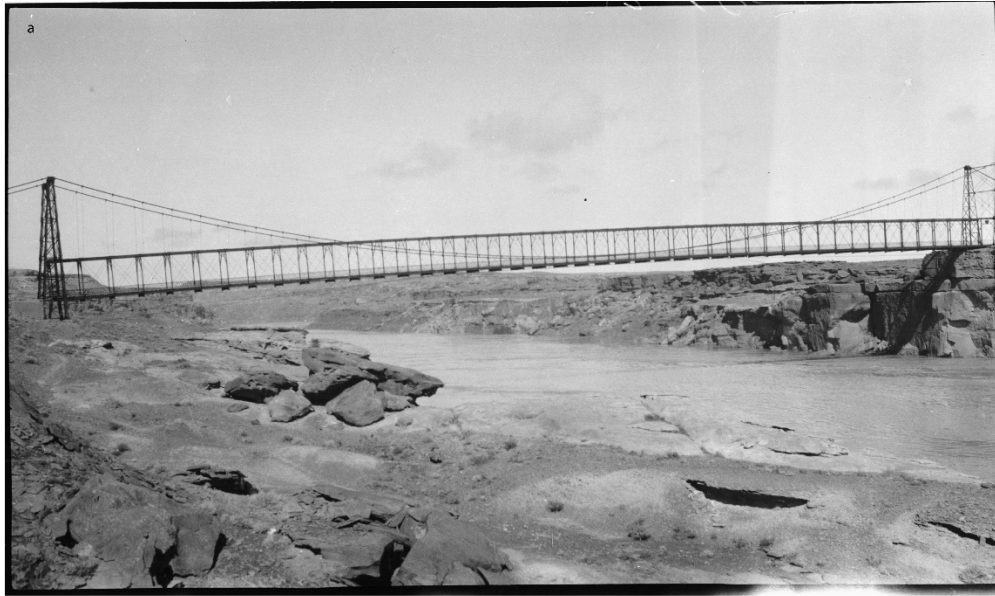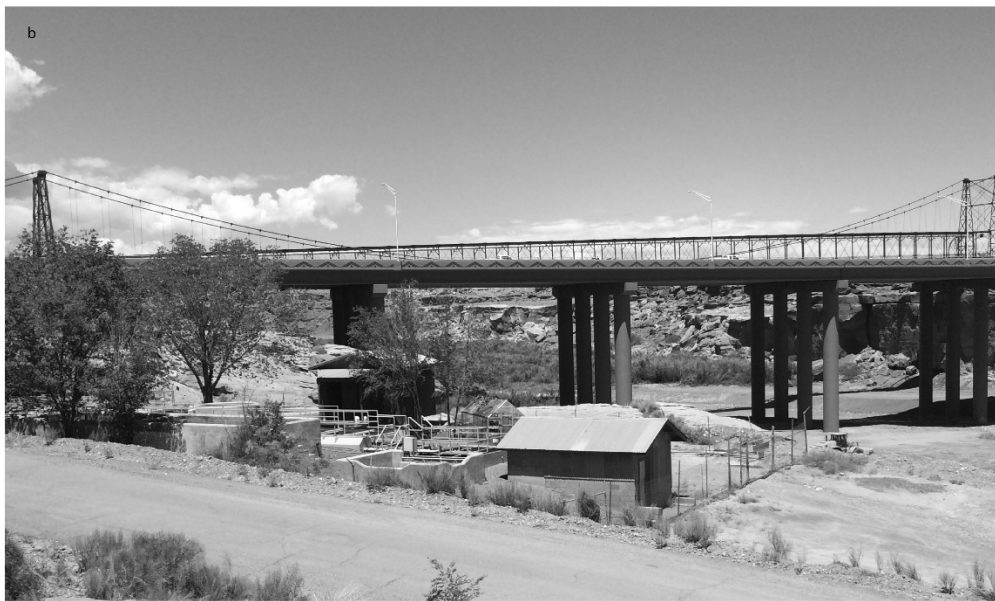

Figure DR1. 1923-2016 repeat photographs of the LCR at Cameron, AZ. Photo (a) depicts the LCR during a flood with an estimated peak discharge of  $\sim 3,400 \text{ m}^3/\text{s}$  (i.e.  $120,000 \text{ ft}^3/\text{s}$ ) at 9:40 a.m. on September 19, 1923; photo taken by G.C. Stevens of the USGS on the left side of the LCR, looking downstream. The photograph in (a) was likely taken near peak discharge of this flood. Repeat photograph in (b) taken by D.J. Dean on May 19, 2016. A second bridge that now serves as Highway 89 has been built upstream of the original suspension bridge in (a). The discharge of this flood was estimated on the basis of rating-curve extrapolation at the Grand Falls gage in combination with analysis of the records from gaging stations on the Colorado River that bracket the LCR. Measurements made on December 13, 2016 indicate that the stage of the 1923 flood in (a) was approximately 6 m above the bed of the river in (b).

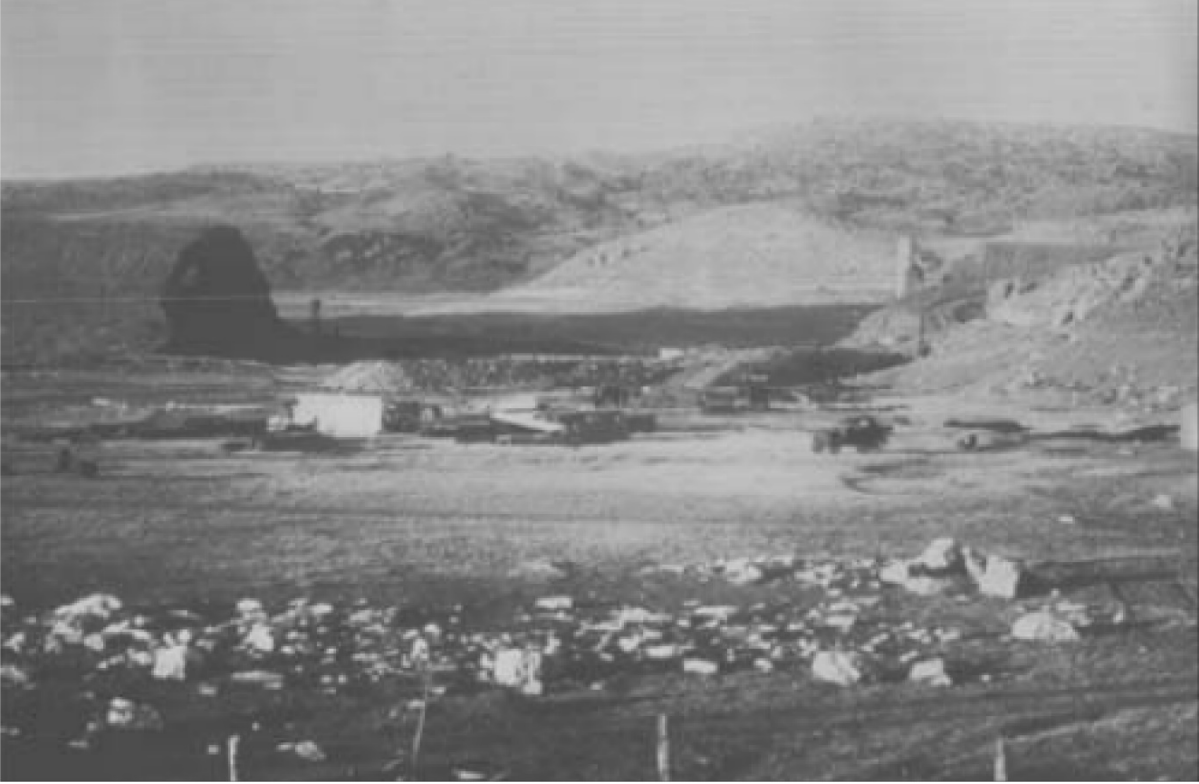

Figure DR2. Image of the Lyman Lake Dam following the dam break in 1915. Image obtained from [http://web.sahra.arizona.edu/education2/wrtt/lecs/Johnson\\_P2\\_DamFailures\\_ho.pdf](http://web.sahra.arizona.edu/education2/wrtt/lecs/Johnson_P2_DamFailures_ho.pdf).

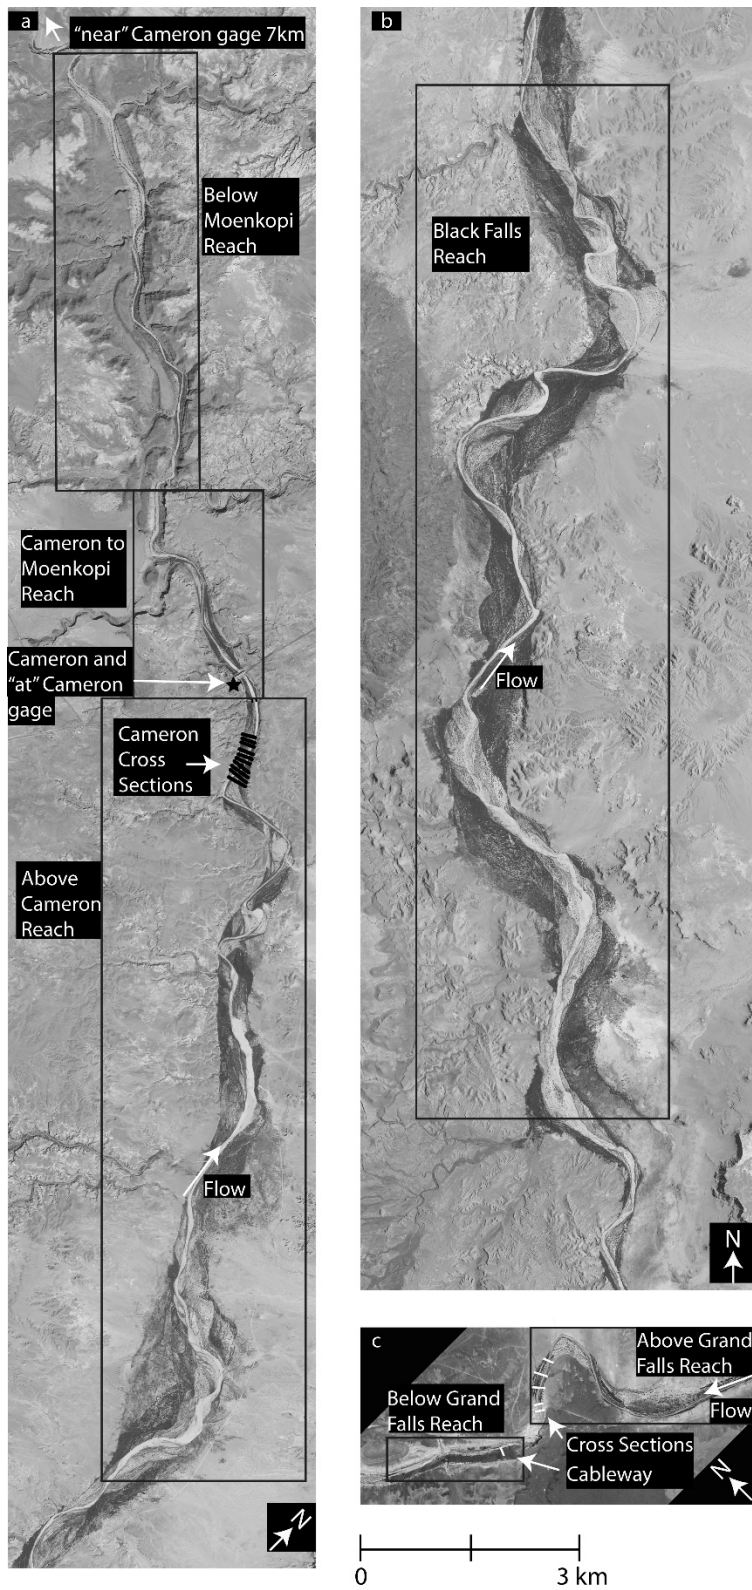

Figure DR3. Aerial-photograph maps of the *above Cameron*, *Cameron to Moenkopi*, and *below Moenkopi* reaches (a), *Black Falls* reach (b), and *Grand Falls* reaches (c). Images were taken in 2013 by the National Aerial Imagery Program.

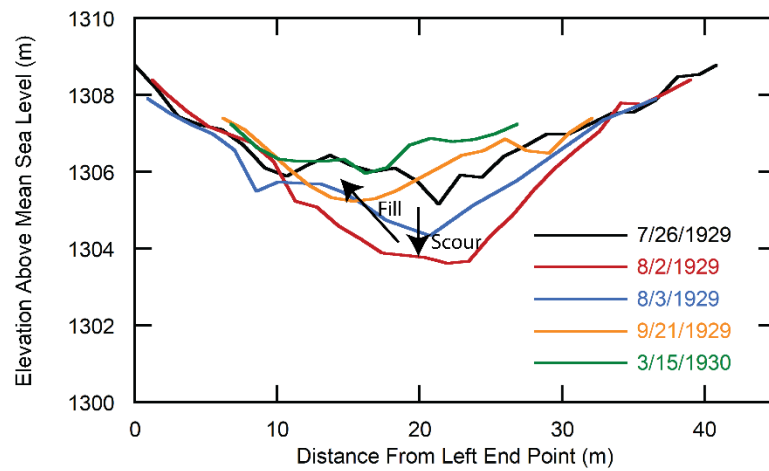

Figure DR4. Topographic measurements made at the Grand Falls cableway cross section depicting seasonal scour and fill in 1929 and 1930. Elevations are orthometric heights above the 1983 North American Datum, calculated using GEOID 12a.

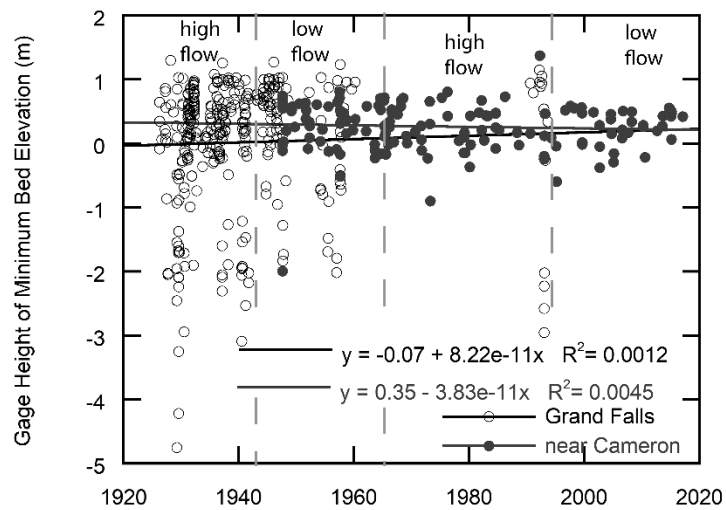

Figure DR5. Minimum bed elevation observed during discharge measurements at the Grand Falls and near Cameron Gages. High and low flow periods refer to periods of high and low TAF in Hydrology Results section and are depicted by gray dashed lines.

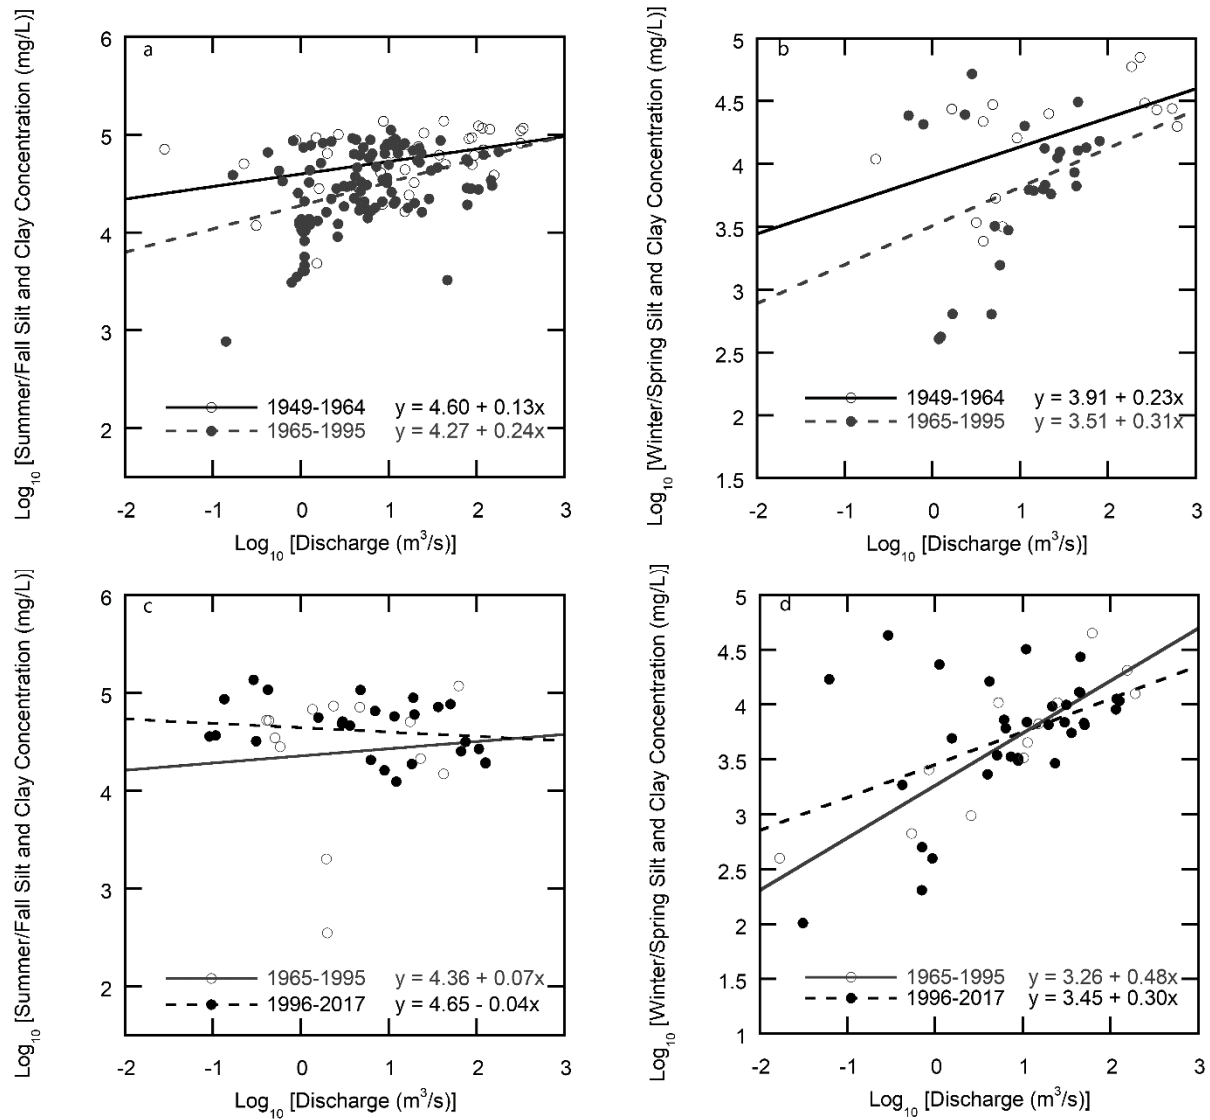

Figure DR6. Discharge — suspended-silt-and-clay concentration relations at the *at* Cameron gage (a and b) and the *near* Cameron gage (c and d). Summer/fall season relations for suspended silt and clay are shown in (a) and (c). Winter/spring season relations for suspended silt and clay are shown in (b) and (d).



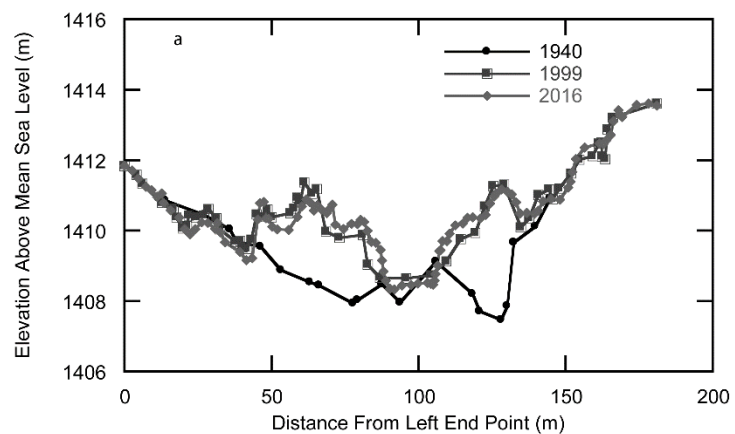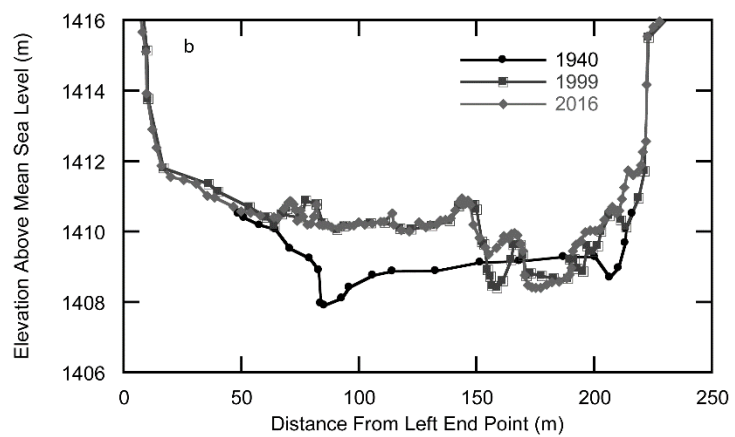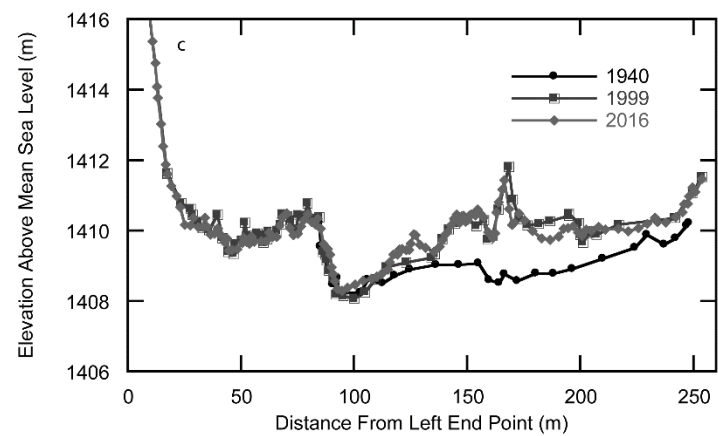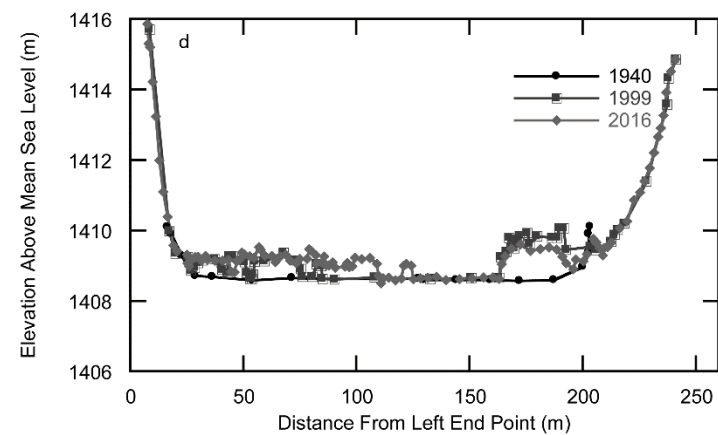

Figure DR7 (previous page). Repeated cross sections in the *above Grand Falls* reach, from upstream (a) to downstream (d). Within original 1940 survey, cross sections were labeled as D, C, B, A, A', from upstream to downstream. Thus, here, cross section D is shown in (a), cross section B is shown in (b), cross section A is shown in (c), and cross section A' is shown in (d). Cross section C is presented in Figure 7c. Elevations are orthometric heights above the 1983 North American Datum, calculated using GEOID 12a. The local 1940 coordinates have been translated accordingly.

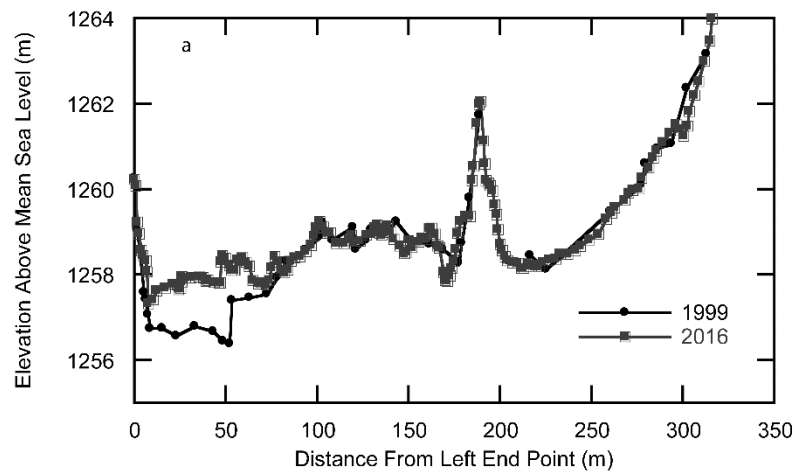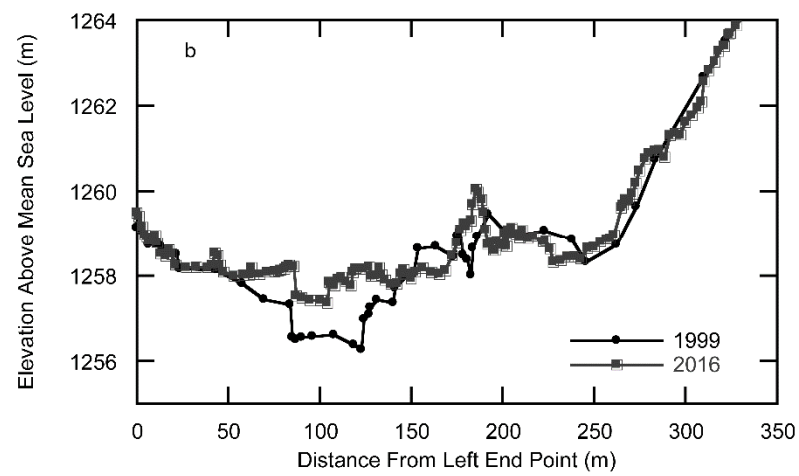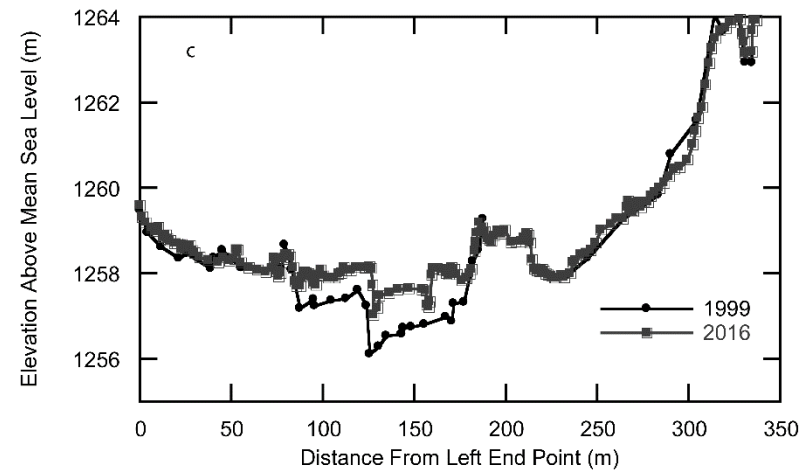

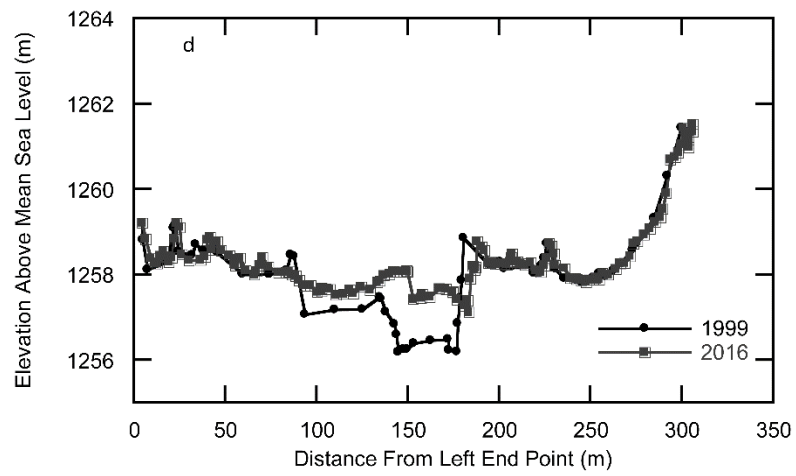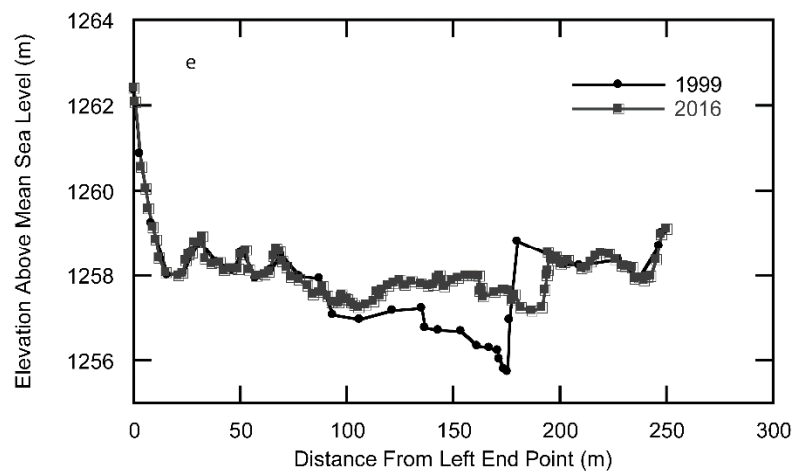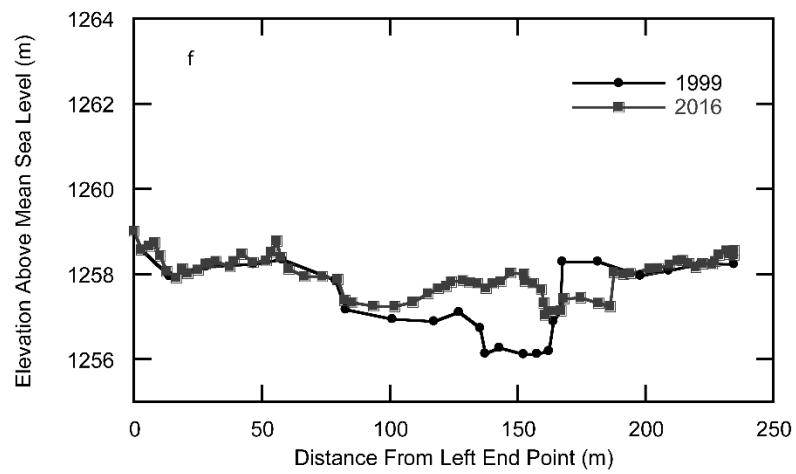

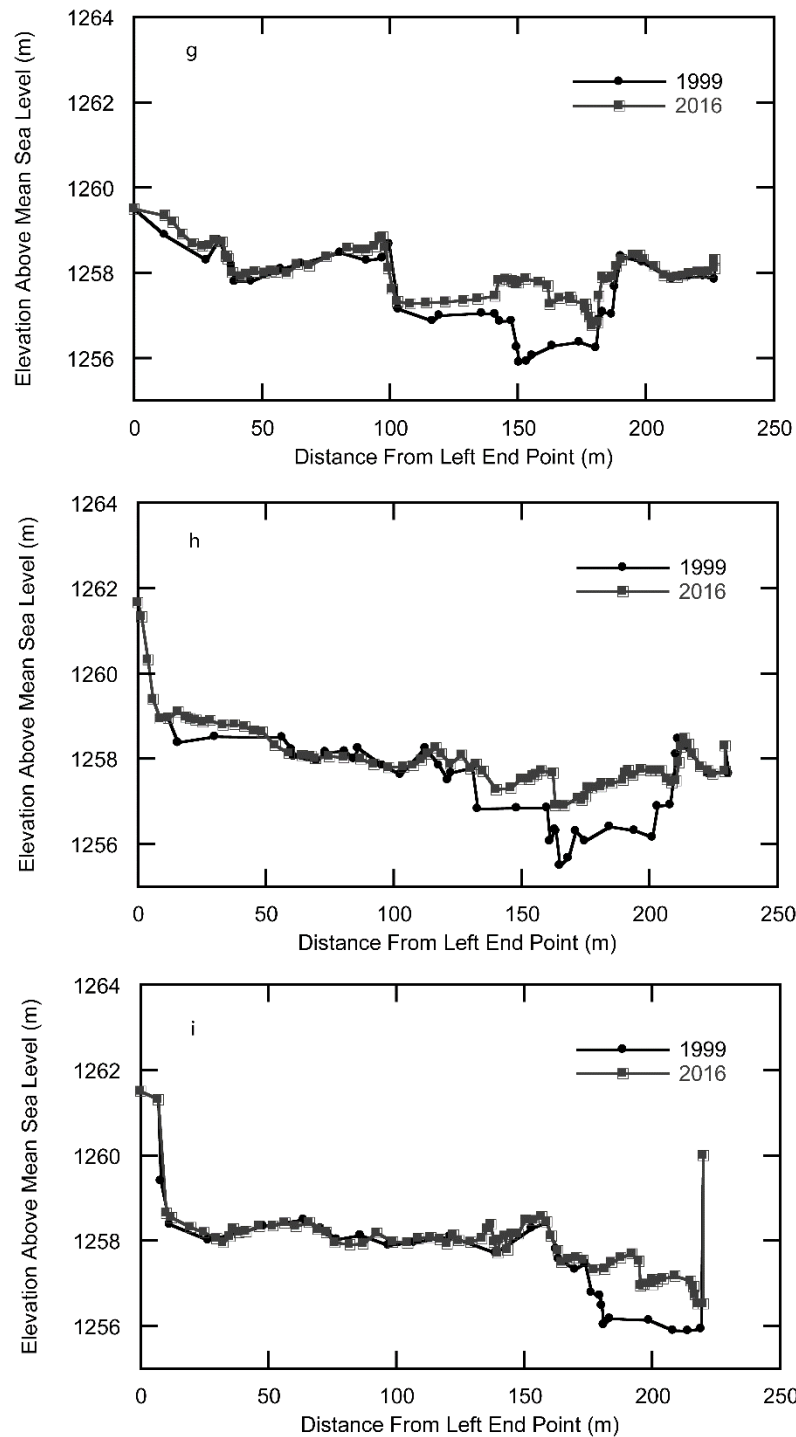

Figure DR8 (this page and previous two pages). Repeated cross sections in the *above Cameron* reach from upstream (a) to downstream (i). Cross sections (a) – (h) represent the first 8 cross sections, and (i) represents the 10<sup>th</sup> cross section downstream. The 9<sup>th</sup> cross section is depicted in Figure 7d. Elevations are orthometric heights above the 1983 North American Datum, calculated using GEOID 12a.

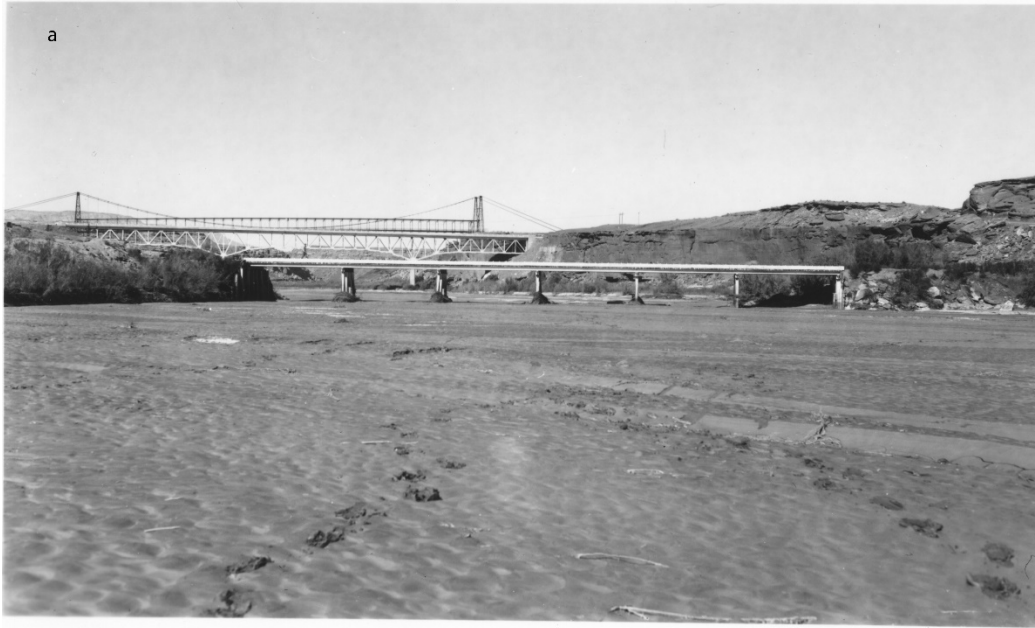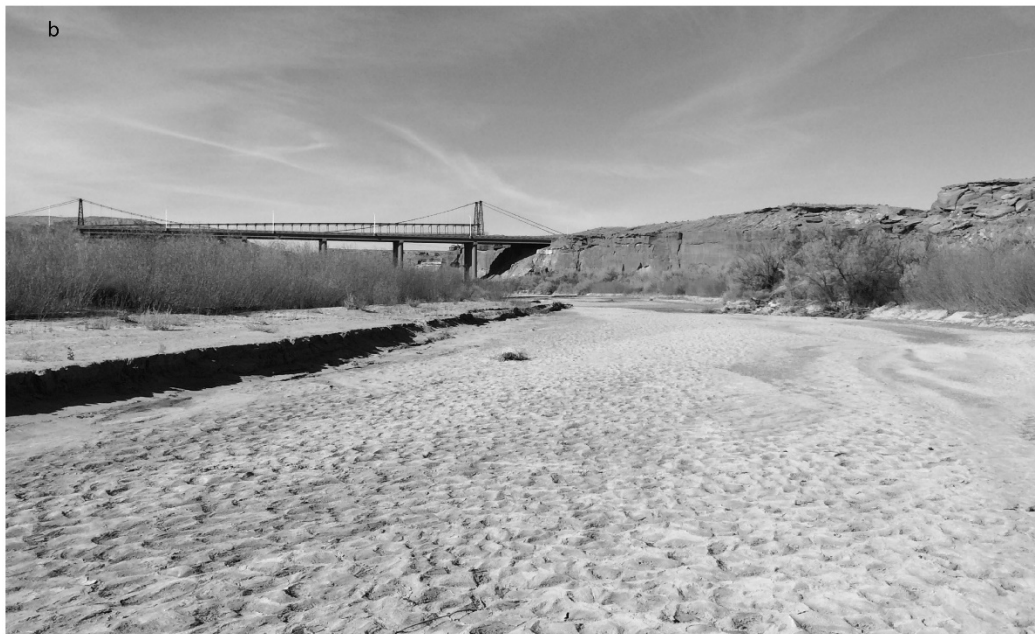

Figure DR9. Repeat photograph of LCR above Cameron, AZ. Photo (a) depicts the LCR in October 21, 1964 looking downstream. Photo (b) depicts the LCR on December 13, 2016. Photo (a) was taken by unknown photographer of the USGS, and photo (b) was taken by the authors. Note that the low bridge in the middle of the photo was removed in 2016 prior to the date photo (b) was collected.

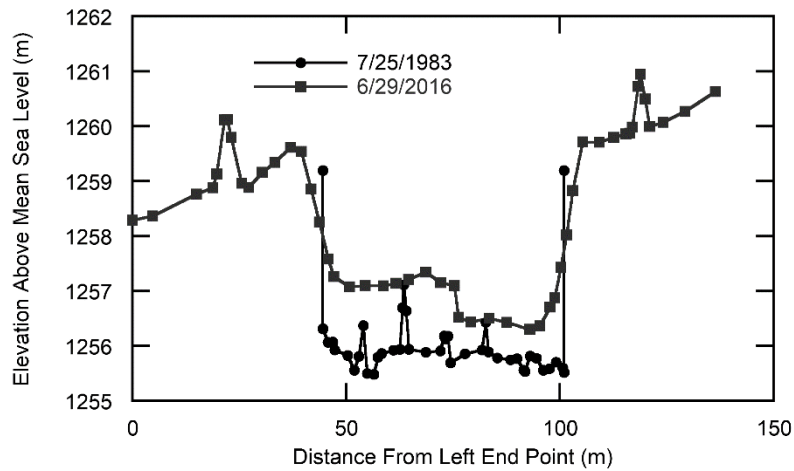

Figure DR10. Channel cross section surveys at the former bridge crossing above Cameron, AZ. Note that when the bridge was removed, the abutments were also removed resulting in less vertical banks during the 2016 survey. Elevations from 1983 are likely within about 0.5 m, as the elevations were measured down from the bridge railing, and the exact elevation of the bridge and its railing were unknown during the 2016 survey because the bridge had been removed.

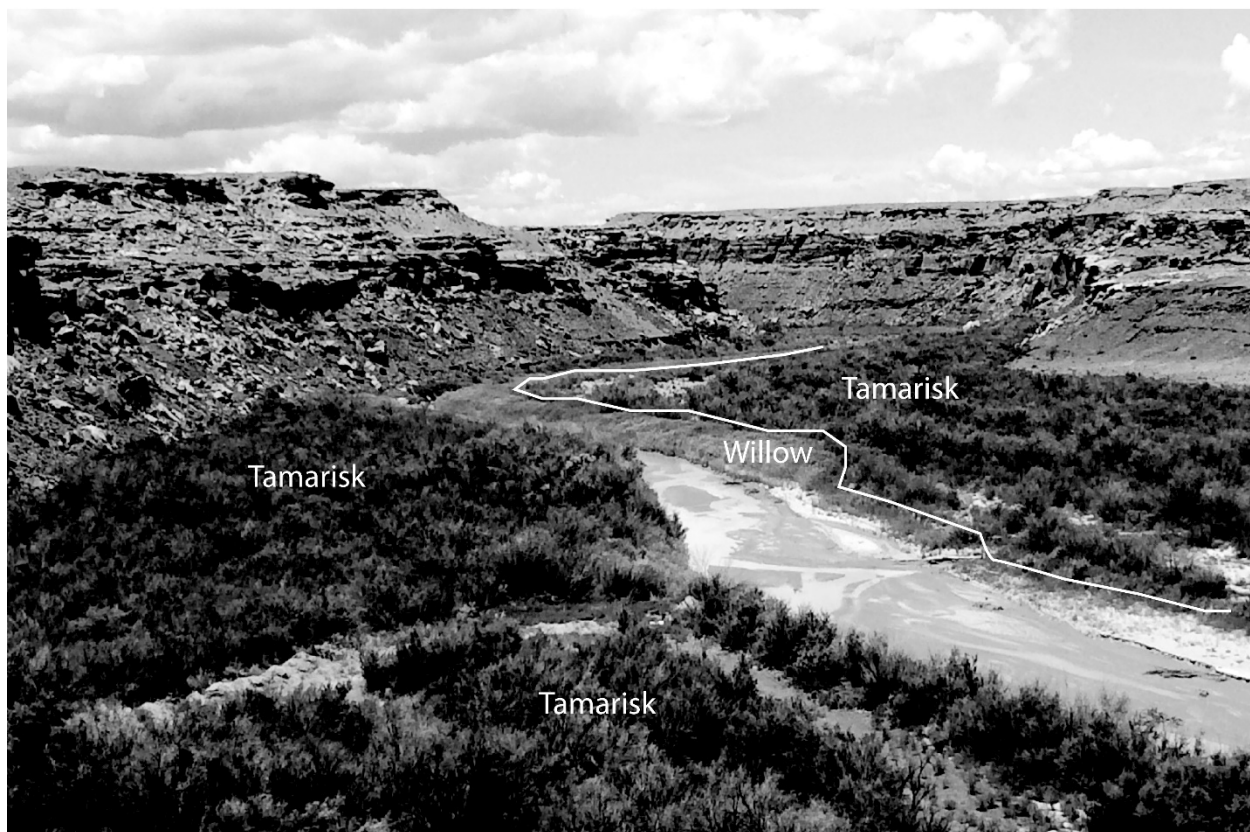

Figure DR11. Photograph of the LCR looking downstream in the *Cameron to Moenkopi* reach showing the dominant vegetation types of tamarisk and willow. Photograph taken by D.J. Dean on May 19, 2016.



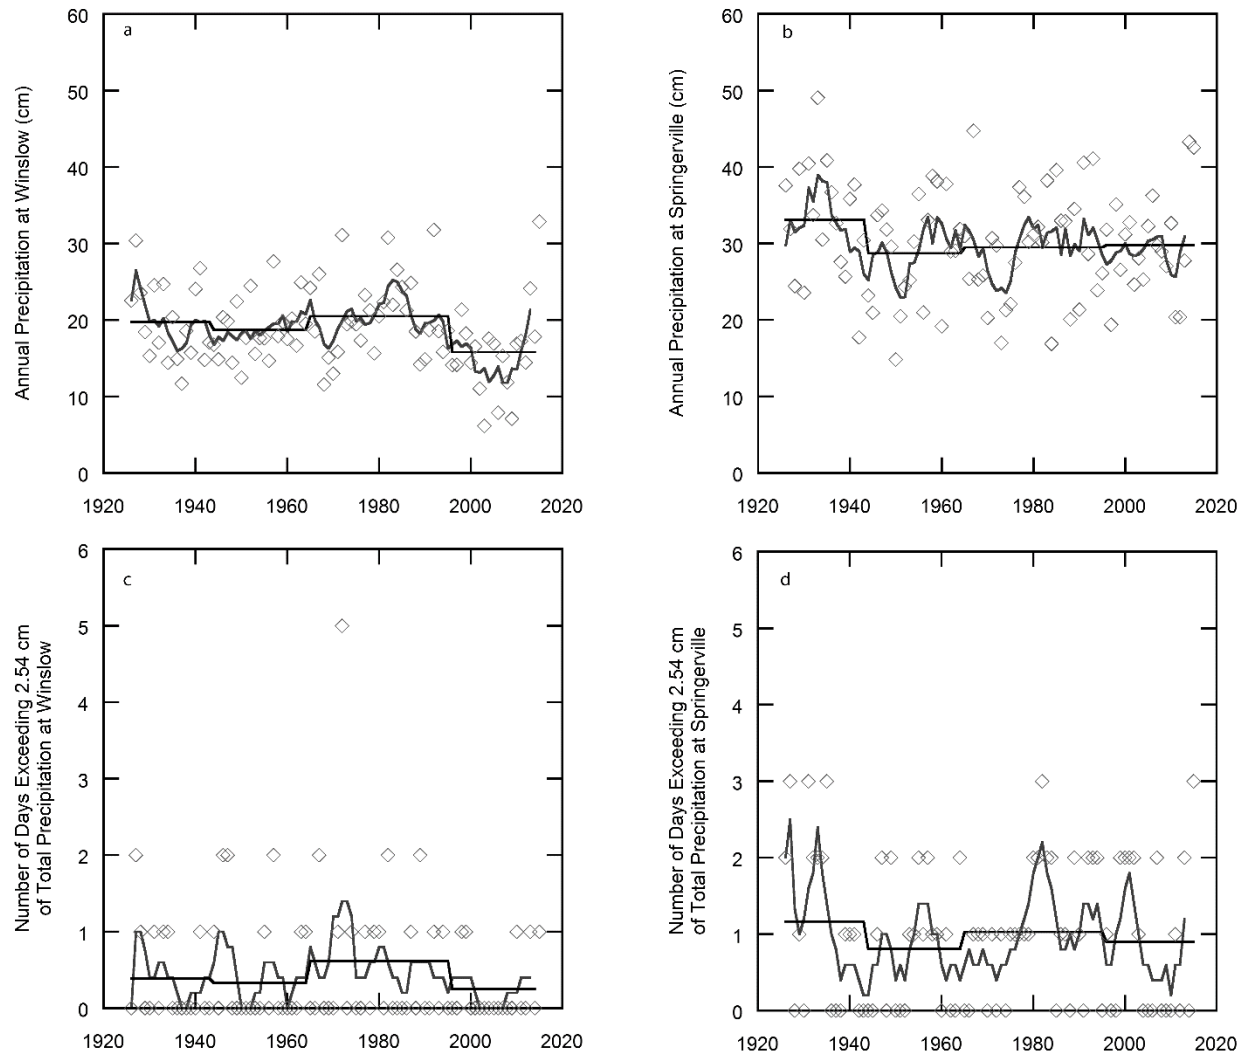

Figure DR12. Annual precipitation data for Winslow, AZ (a), Springerville, AZ (b), and the number of days with greater than 2.54 cm of rain at Winslow (c), Springerville (d). Annual data are diamonds, horizontal lines are averages for the four time periods identified in the Hydrology Results section, and dark wavy lines are 5-year running averages. Data were obtained from <https://www.ncdc.noaa.gov/cdo-web/datatools/>. Missing data was obtained from Sellers and Hill (1974).

Sellers, W.D., Hill, R.H. (Eds.), 1974. Arizona climate, 1931-1972. Tuscon, AZ, University of Arizona Press.

**Table DR1. Sediment Sampling Locations**

| Location                                                                             | Time period of Sampling                |
|--------------------------------------------------------------------------------------|----------------------------------------|
| Little Colorado River at Grand Falls, AZ<br>(station #09401000)                      | 1931, 1990-1994, 2002-<br>2014         |
| Little Colorado River <i>at</i> Cameron, AZ<br>(station #09401200)                   | 1947-1970, 1974-1986,<br>1994-2000     |
| Little Colorado River <i>near</i> Cameron, AZ<br>(station #09402000)                 | 1957-1958, 1966-1970,<br>1994-present  |
| Little Colorado River above the mouth<br>near Desert View, AZ (station<br>#09402300) | 1983, 1991-1993, 1998,<br>2003-present |

**Table DR2. AERIAL PHOTOGRAPH SOURCES**

Digital scans of the 1930s imagery were obtained from the National Archives and Records Administration, and scans of the later imagery were obtained from the USGS Earth Resources Observation and Science Center. Scans were obtained at the highest possible resolution. Digital imagery taken in 2007, 2010, and 2013 were orthorectified by the National Aerial Imagery Program (NAIP). Digital scans for the previous years were orthorectified by Pinnacle Mapping Technologies in Flagstaff, AZ, using photogrammetric block calibration in ERDAS IMAGINE. The reported Root Mean Square Errors (RMSEs) for orthorectification are reported in Table DR3.

| Year      | Source                                | Obtained from |
|-----------|---------------------------------------|---------------|
| 1933-1934 | U.S. Soil Conservation Service        | NARA*         |
| 1936      | U.S. Soil Conservation Service        | NARA          |
| 1952-1954 | U.S. Army Map Service                 | USGS EROS†    |
| 1968      | U.S. Geological Survey                | USGS EROS     |
| 1979      | U.S. Geological Survey                | USGS EROS     |
| 1992      | National Aerial Photography Program   | USGS EROS     |
| 1997      | National Aerial Photography Program   | USGS EROS     |
| 2007      | National Agricultural Imagery Program | USGS EROS     |
| 2010      | National Agricultural Imagery Program | USGS EROS     |
| 2013      | National Agricultural Imagery Program | USGS EROS     |

\* U.S. National Archives and Records Administration

† U.S. Geological Survey Earth Resources Observation and Science Center

**Table DR3. ERRORS ASSOCIATED WITH CHANNEL WIDTH MEASUREMENTS ON AERIAL PHOTOGRAPHS**

Uncertainty in the delineation of the active-channel boundaries were evaluated using the methods of Mount et al. (2003) and Swanson et al. (2011) where the error in active-channel width delineation ( $E_w$ ) is defined as follows:

$$E_w = \sqrt{2\rho R} + 2\Theta, \quad (1)$$

where  $\sqrt{2\rho R}$  is the error associated with digitizing the bank lines, and  $2\Theta$  is the image distortion error. Here,  $\rho$  is the mean width between repeat bank-line digitizations in meters and  $R$  is pixel resolution in m/pixel. For each year of aerial imagery, we calculated  $\rho$  by digitizing the left and right bank of a 5 km section of the *above Cameron* reach, 5 times each, and then calculated the mean distance of each line from the digitized active-channel boundary; the *above Cameron* reach is the reach with the greatest geomorphic complexity. During this process, we made sure to digitize the boundaries of all channel-margin features where there was uncertainty in the original active-channel delineation. In 1968, there was insufficient aerial photograph coverage of the *above Cameron* reach, therefore, we calculated  $\rho$  using a 5 km section of the *Black Falls* reach. In 1952, there were only photographs of the *above* and *below Grand Falls* reaches, therefore we calculated  $\rho$  using a 5km section of the those two reaches that spanned both upstream and downstream of the falls. The image distortion error  $2\Theta$  was evaluated as 2 times the RMSE, or the reported uncertainty in the ground sample distance compared to the true ground distance reported for the NAIP imagery.

| Date                   | Reaches <sup>*</sup>      | Width error $\rho$ | Scan Resolution $R$ (m/pixel) | Digitization Error $\sqrt{2\rho R}$ , (m) | RMSE (pixels) | $\Theta$ (m) | Total Error $E_w$ (m) |
|------------------------|---------------------------|--------------------|-------------------------------|-------------------------------------------|---------------|--------------|-----------------------|
| 1933-1934 <sup>†</sup> | Cameron <sup>§</sup>      | 6.46               | 0.40                          | 2.27                                      | 0.10          | 0.04         | 2.35                  |
| 10/7/1936              | Black Falls               | 6.46               | 0.90                          | 3.41                                      | 0.10          | 0.09         | 3.59                  |
| 1933-1934 <sup>†</sup> | Grand Falls <sup>#</sup>  | 6.46               | 0.50                          | 2.54                                      | 2.80          | 1.40         | 5.34                  |
| 9/11/1953, 4/1/1954    | Cameron                   | 2.61               | 1.00                          | 2.28                                      | 1.31          | 1.31         | 4.90                  |
| 4/1/1954               | Black Falls               | 2.61               | 1.00                          | 2.28                                      | 1.46          | 1.46         | 5.20                  |
| 10/10/1952, 10/23/1952 | Grand Falls               | 4.20               | 0.60                          | 2.24                                      | 0.95          | 0.57         | 3.38                  |
|                        | Cameron                   | N.A.               | N.A.                          | N.A.                                      | N.A.          | N.A.         | N.A.                  |
| 6/1, 6/13, 9/1/1968    | Black Falls               | 2.32               | 0.70                          | 1.80                                      | 1.22          | 0.85         | 3.51                  |
| 6/13/1968              | Grand Falls               | 2.32               | 0.70                          | 1.80                                      | 1.03          | 0.72         | 3.24                  |
| 4/19-20/1979,          | Cameron                   | 1.75               | 0.71                          | 1.58                                      | 1.35          | 0.96         | 3.49                  |
| 4/20-21, 8/22/1979     | Black Falls               | 1.75               | 0.70                          | 1.56                                      | 1.01          | 0.71         | 2.98                  |
| 4/19, 8/22/1979        | Grand Falls               | 1.75               | 0.70                          | 1.56                                      | 1.18          | 0.83         | 3.22                  |
| 4/17, 9/1/1992         | Cameron                   | 2.55               | 0.30                          | 1.24                                      | 1.45          | 0.44         | 2.11                  |
| 4/17/1992              | Black Falls               | 2.55               | 1.00                          | 2.26                                      | 1.48          | 1.48         | 5.22                  |
| 4/17, 9/22/1992        | Grand Falls               | 2.55               | 0.30                          | 1.24                                      | 1.12          | 0.34         | 1.91                  |
| 7/4, 7/7, 10/17,1997   | Cameron <sup>**</sup>     | 5.77               | 1.00                          | 3.40                                      | 1.69          | 1.69         | 6.77                  |
| 7/4, 7/7, 10/17,1997   | Black Falls <sup>**</sup> | 6.81               | 0.30                          | 2.02                                      | 2.42          | 0.73         | 3.47                  |
| 10/16-17,1997          | Grand Falls <sup>**</sup> | 5.77               | 0.30                          | 1.86                                      | 2.20          | 0.66         | 3.18                  |

|                   |                          |      |      |      |      |      |       |
|-------------------|--------------------------|------|------|------|------|------|-------|
| 6/8/2007          | Cameron <sup>†</sup>     | 1.86 | 1.00 | 1.93 | N.A. | 6.00 | 13.93 |
| 6/8/2007          | Black Falls <sup>†</sup> | 1.86 | 1.00 | 1.93 | N.A. | 6.00 | 13.93 |
| 6/1, 6/8/2007     | Grand Falls <sup>†</sup> | 1.86 | 1.00 | 1.93 | N.A. | 6.00 | 13.93 |
| 6/5/2010          | Cameron <sup>†</sup>     | 2.16 | 1.00 | 2.08 | N.A. | 6.00 | 14.08 |
| 6/5/2010          | Black Falls <sup>†</sup> | 2.16 | 1.00 | 2.08 | N.A. | 6.00 | 14.08 |
| 7/27/2010         | Grand Falls <sup>†</sup> | 2.16 | 1.00 | 2.08 | N.A. | 6.00 | 14.08 |
| 6/7, 6/18-19/2013 | Cameron <sup>†</sup>     | 2.93 | 1.00 | 2.42 | N.A. | 6.00 | 14.42 |
| 6/18-19/2013      | Black Falls <sup>†</sup> | 2.93 | 1.00 | 2.42 | N.A. | 6.00 | 14.42 |
| 6/18/2013         | Grand Falls <sup>†</sup> | 2.93 | 1.00 | 2.42 | N.A. | 6.00 | 14.42 |

<sup>\*</sup> Given that the three downstream reaches near Cameron, and the two upstream reaches near Grand Falls are contiguous, these reaches are grouped under "Cameron" and "Grand Falls" reaches, respectively, to conserve space

<sup>†</sup> Exact air photo dates unknown. Photo set known to pre-date a meander cutoff near a USGS gaging station on Moenkopi Wash that occurred on August 28, 1934

<sup>§</sup> No coverage for Cameron to Moenkopi reach, or below Moenkopi reach.

<sup>#</sup> Coverage only exists for the above Grand Falls reach.

<sup>\*\*</sup> Digital orthophoto quarter quadrangles available for download from USGS EROS, RMSE is average of reported RMSE for each quarter quadrangle.

<sup>##</sup> No RMSE for these digital orthophoto quadrangles reported,  $\Theta$  is the reported error between ground sample distance to true ground.

**Table DR4. HYDRAULIC MODELING PARAMETERS**

1-Dimensional hydraulic modeling was conducted using U.S. Army Corps of Engineers Hydrologic Engineering Center's River Analysis System (HEC-RAS). A Simplified channel geometry was created by using the average values of reach-averaged channel widths measured on aerial photographs in 1953/1954 and 2013 (Table DR6), and an estimated channel depth of 2m, with 45 degree banks, thus creating a trapezoidal channel. The width of the alluvial valley was also approximated at 750 m based on the alluvial widths in Table 1. Channel slopes and Manning's n roughness values of the first two runs were based on a historical channel survey conducted in the *above Grand Falls* reach in 1940 (Fig. 4c). Water surface slopes from that survey ranged between 0.00066 and 0.0014, and Manning's n was estimated to be between 0.018 and 0.022. We chose an initial model slope of 0.0008 which more closely resembles the water surface slope at the upstream end of the survey reach (see cross sections Fig. DR7a and b) before the water surface begins steepening as it approaches Grand Falls. We used a channel roughness of 0.018 and a floodplain roughness of 0.02 in model runs 1-3. In model run 4, floodplain roughness was increased to 0.1, which is a reasonable approximation based on the density of the floodplain forests (Fig. 4b).

| Model Run/<br>Simulation Year | Alluvial Valley<br>Width (m) | Channel<br>Width (m) | Channel<br>Depth (m) | Slope   | Channel<br>Length (km) | Cross Section<br>Spacing (m) | Manning's n<br>Channel | Manning's n<br>Floodplain |
|-------------------------------|------------------------------|----------------------|----------------------|---------|------------------------|------------------------------|------------------------|---------------------------|
| 1 - 1954                      | 750                          | 350                  | 2                    | 0.0008  | 36                     | 100                          | 0.018                  | 0.02                      |
| 2 - 2013                      | 750                          | 62                   | 2                    | 0.0008  | 36                     | 100                          | 0.018                  | 0.02                      |
| 3 - 2013                      | 750                          | 62                   | 2                    | 0.00071 | 40.5                   | 100                          | 0.018                  | 0.02                      |
| 4 - 2013                      | 750                          | 62                   | 2                    | 0.00071 | 40.5                   | 100                          | 0.018                  | 0.1                       |

**Table DR5. HYDRAULIC MODELING INPUTS**

The input hydrograph consisted of the streamflow measured at the Grand Falls gage between 3/25/1954 and 3/30/1954. The rise of the input hydrograph was modified to improve model stability and convergence, and discharge values were linearly interpolated to 15-minute timestamps for the model input. The model was run from 3/24/1954 18:45 through 3/29/1954 at 00:00. The Input hydrograph can be downloaded at <https://doi.org/10.5066/P9XPWIBM> (Dean and Topping, 2018). Channel geometry data are listed below.

| 1954                                |                  | 2013                                |                  |
|-------------------------------------|------------------|-------------------------------------|------------------|
| Distance from Left<br>End Point (m) | Elevation<br>(m) | Distance from<br>Left End Point (m) | Elevation<br>(m) |
| 0                                   | 100              | 0                                   | 100              |
| 0                                   | 90               | 0                                   | 90               |
| 200                                 | 90               | 344                                 | 90               |
| 202                                 | 89               | 346                                 | 89               |
| 548                                 | 89               | 404                                 | 89               |
| 550                                 | 90               | 406                                 | 90               |
| 750                                 | 90               | 750                                 | 90               |
| 750                                 | 100              | 750                                 | 100              |

TABLE DR6. CHANNEL WIDTH MEASUREMENTS DETERMINED FROM AERIAL PHOTOGRAPH ANALYSIS

| Year    | Above Cameron            |                                        | Cameron to Meonkopi Wash |                                        | Below Moenkopi           |                                        | Black Falls              |                                        | Above Grand Falls        |                                        | Below Grand Falls        |                                        |
|---------|--------------------------|----------------------------------------|--------------------------|----------------------------------------|--------------------------|----------------------------------------|--------------------------|----------------------------------------|--------------------------|----------------------------------------|--------------------------|----------------------------------------|
|         | Active-channel width (m) | % of channel width of first photograph | Active-channel width (m) | % of channel width of first photograph | Active-channel width (m) | % of channel width of first photograph | Active-channel width (m) | % of channel width of first photograph | Active-channel width (m) | % of channel width of first photograph | Active-channel width (m) | % of channel width of first photograph |
| 1933/34 | 495.9                    | 100.0                                  | 136.3                    | 100                                    | N.A.                     | N.A.                                   | N.A.                     | N.A.                                   | 176.6                    | 100.0                                  | N.A.                     | N.A.                                   |
| 1936    | N.A.                     | N.A.                                   | N.A.                     | N.A.                                   | N.A.                     | N.A.                                   | 412.8                    | 100.0                                  | N.A.                     | N.A.                                   | N.A.                     | N.A.                                   |
| 1952    | N.A.                     | N.A.                                   | N.A.                     | N.A.                                   | N.A.                     | N.A.                                   | N.A.                     | N.A.                                   | 131.4                    | 74.4                                   | 47.3                     | 100.0                                  |
| 1954    | 358.1                    | 72.2                                   | 122.1                    | 89.6                                   | 71.1                     | 100.0                                  | 334.2                    | 81.0                                   | N.A.                     | N.A.                                   | N.A.                     | —                                      |
| 1968    | N.A.                     | N.A.                                   | N.A.                     | N.A.                                   | N.A.                     | N.A.                                   | 251.1                    | 60.8                                   | 56.6                     | 32.0                                   | 46.7                     | 98.8                                   |
| 1979    | 252.3                    | 50.9                                   | 86.2                     | 63.3                                   | 62.8                     | 88.3                                   | 286.2                    | 69.3                                   | 44.2                     | 25.0                                   | 48.0                     | 101.5                                  |
| 1992    | 150.1                    | 30.3                                   | 66.2                     | 48.6                                   | 43.9                     | 61.7                                   | 129.4                    | 31.3                                   | 35.8                     | 20.3                                   | 45.5                     | 96.2                                   |
| 1997    | 111.6                    | 22.5                                   | 55.8                     | 41.0                                   | 49.9                     | 70.2                                   | 124.0                    | 30.0                                   | 30.7                     | 17.4                                   | 41.5                     | 87.7                                   |
| 2007    | 101.8                    | 20.5                                   | 44.3                     | 32.5                                   | 40.2                     | 56.5                                   | 75.8                     | 18.4                                   | 24.4                     | 13.8                                   | 34.4                     | 72.8                                   |
| 2010    | 82.8                     | 16.7                                   | 41.1                     | 30.2                                   | 35.5                     | 49.9                                   | 72.1                     | 17.5                                   | 22.3                     | 12.6                                   | 35.2                     | 74.4                                   |
| 2013    | 66.9                     | 13.5                                   | 37.5                     | 27.5                                   | 35.1                     | 49.4                                   | 56.3                     | 13.6                                   | 21.1                     | 11.9                                   | 37.5                     | 79.3                                   |



TABLE DR7: RESULTS OF THE REGRESSION ANALYSES FOR DISCHARGE—CONCENTRATION RELATIONS

| Periods                 | Sediment fraction | Season            | Intercept 1st period | Slope 1st period | Standard error | Intercept 1st period log transformed | Slope 1st period log transformed | Standard error log transformed | Intercept 2nd period | Slope 2nd period | Standard error | Intercept 2nd period log transformed | Slope 2st period log transformed | Standard error log transformed | Significant at alpha p=0.05? | F value | p value |
|-------------------------|-------------------|-------------------|----------------------|------------------|----------------|--------------------------------------|----------------------------------|--------------------------------|----------------------|------------------|----------------|--------------------------------------|----------------------------------|--------------------------------|------------------------------|---------|---------|
| 1949-1964/<br>1965-1995 | Silt and Clay     | Summer/<br>Fall   | 58,877               | 157              | 62             | 4.60                                 | 0.128                            | 0.05                           | 37,225               | 73               | 78             | 4.27                                 | 0.238                            | 0.05                           | Yes                          | 11.35   | <0.01   |
| 1965-1995/<br>1996-2017 | Silt and Clay     | Summer/<br>Fall   | 37,703               | 615              | 474            | 4.36                                 | 0.032                            | 0.12                           | 56,496               | -268             | 154            | 4.65                                 | -0.031                           | 0.05                           | No                           | 2.05    | 0.16    |
| 1949-1964/<br>1965-1995 | Sand              | Summer/<br>Fall   | 3,464                | 86               | 13             | 2.54                                 | 0.787                            | 0.11                           | 604                  | 138              | 8              | 1.76                                 | 1.198                            | 0.13                           | Yes                          | 9.64    | <0.01   |
| 1965-1995/<br>1996-2017 | Sand              | Summer/<br>Fall   | 235                  | 62               | 22             | 1.35                                 | 1.302                            | 0.20                           | 1,011                | 46               | 12             | 1.90                                 | 0.933                            | 0.09                           | Yes                          | 7.52    | <0.01   |
| 1949-1964/<br>1965-1995 | Silt and Clay     | Winter/<br>Spring | 19,423               | 31               | 23             | 3.91                                 | 0.230                            | 0.09                           | 11,014               | 41               | 114            | 3.51                                 | 0.308                            | 0.18                           | No                           | 3.85    | 0.06    |
| 1965-1995/<br>1996-2017 | Silt and Clay     | Winter/<br>Spring | 6,216                | 90               | 54             | 3.26                                 | 0.477                            | 0.08                           | 8,506                | 25               | 49             | 3.45                                 | 0.300                            | 0.10                           | No                           | 1.36    | 0.25    |
| 1949-1964/<br>1965-1995 | Sand              | Winter/<br>Spring | 2,602                | 60               | 10             | 2.53                                 | 0.758                            | 0.09                           | 790                  | 98               | 22             | 1.94                                 | 1.073                            | 0.18                           | Yes                          | 4.80    | 0.04    |
| 1965-1995/<br>1996-2017 | Sand              | Winter/<br>Spring | 1,195                | 57               | 15             | 1.76                                 | 1.021                            | 0.25                           | 665                  | 71               | 8              | 1.06                                 | 0.088                            | 0.04                           | No                           | 0.55    | 0.46    |

Table DR8. RESULTS OF HYDRAULIC MODELING

| Model Run | Change in Peak<br>Discharge (m <sup>3</sup> /s) | % Change in Peak<br>Discharge | Travel Time of<br>Flood Peak (hrs) |
|-----------|-------------------------------------------------|-------------------------------|------------------------------------|
| 1         | 5.2                                             | 2.4                           | 6.0                                |
| 2         | 7.9                                             | 3.7                           | 10.5                               |
| 3         | 9.8                                             | 4.6                           | 12.8                               |
| 4         | 36.6                                            | 17.2                          | 30.5                               |
